# Supplementary material for: Negative Symptom Interventions in Youth at Risk of Psychosis: A Systematic Review and Network Meta-analysis
Source: Oxford University Press journal article supplement (doi:10.1093/schbul/sbx139), 2017-09-06
Supplement: sbx139_suppl_supplementary-material-3.doc [file sbx139_suppl_supplementary-material-3.doc]

**Supplementary Material 3.** Description of the Network Meta-Analysis with References

As stated, the NMA allowed for comparisons between treatment arms that have not been compared before (e.g. omega-3 to glycine to antipsychotics, etc.) that used a common comparator (e.g. placebo) by integrating direct evidence (e.g. 3 studies comparing omega-3 to placebo).1 Only RCTs treatment effects between individual RCT intervention arms were evaluated using a random-effects multivariate NMA assuming consistency and a common heterogeneity across all comparisons in the network model using the generic inverse-variance method.2, 3 Any study that was observational or any arm in a RCT that was observational in nature was excluded from the NMA. Moreover, any study including participants other than CHR were excluded from the NMA (e.g., schizotypy). In addition, data in the NMA used follow-up scores adjusting the mean of the follow-up scores using regression as described in Dias et al., 2012.1 Next, the formulae for Hedges' *g* detailed by White and Thomas (2005)4 was used to calculate the SMD for the NMA, which is considered an unbiased estimator and involves corrections for small numbers of degrees of freedom. Due to the differences in treatment types (i.e. antipsychotics, nutritional supplements, psychotherapy) and differences in dose the primary duration reported in the NMA was the primary outcome endpoint reported in the RCTs. We opted for a random effects Multivariate Network Meta-Analysis as described by White et al 2013 5 and Higgins 20136 because it can handle multiple treatment arms (more than 2 arms in one RCT)7 which was expected in CHR RCTs and properly accounts for correlations between effect sizes from multi-arm RCTs.7

**References**

**1.** Bucher HC, Guyatt GH, Griffith LE, Walter SD. The results of direct and indirect treatment comparisons in meta-analysis of randomized controlled trials. *Journal of Clinical Epidemiology* 6// 1997;50(6):683-691.

**2.** Dias S, Sutton AJ, Ades AE, Welton NJ. Evidence Synthesis for Decision Making 2: A Generalized Linear Modeling Framework for Pairwise and Network Meta-analysis of Randomized Controlled Trials. *Medical Decision Making* 06/13/received 06/22/accepted 2013;33(5):607-617.

**3.** Caldwell DM, Ades AE, Higgins JPT. Simultaneous comparison of multiple treatments: combining direct and indirect evidence. *BMJ* 2005;331(7521):897-900.

**4.** White IR, Thomas J. Standardized mean differences in individually-randomized and cluster-randomized trials, with applications to meta-analysis. *Clinical Trials* 2005;2(2):141-151.

**5.** White IR. Multivariate random-effects meta-regression: updates to mvmeta. *Stata Journal* 2011;11(2):255.

**6.** Higgins J, Jackson D, Barrett J, Lu G, Ades A, White I. Consistency and inconsistency in network meta‐analysis: concepts and models for multi‐arm studies. *Research synthesis methods* 2012;3(2):98-110.

**7.** White IR, Barrett JK, Jackson D, Higgins J. Consistency and inconsistency in network meta‐analysis: model estimation using multivariate meta‐regression. *Research synthesis methods* 2012;3(2):111-125.
