# Supplementary material for: Negative Symptom Interventions in Youth at Risk of Psychosis: A Systematic Review and Network Meta-analysis
Source: Oxford University Press journal article supplement (doi:10.1093/schbul/sbx139), 2017-09-06
Supplement: sbx139_suppl_supplementary_material_2.doc [file sbx139_suppl_supplementary_material_2.doc]

**Supplementary Material 2.** Search Strategies

Database: Embase

1 exp psychotic disorders/ (253448)

2 deficit syndrome.ti,ab. (471)

3 exp schizophrenia/ (167961)

4 ((chronic$ or serious or persistent or severe$) adj (mental$ or psychological$) adj (disorder$ or ill$)).mp. (11400)

5 (delusion$ or hebephreni$ or psychosis or psychoses or psychotic$ or schizo$).mp. (279220)

6 or/1-5 (305720)

7 risk factors/ (427284)

8 symptom$.sh. or (prodrom$ or risk$).hw. (2614940)

9 (blips or brief limited intermittent psychotic symptom$ or ((attenuat$ or early or pre?monitory) adj2 (sign$ or symptom$)) or pre?delusion$ or pre?hallucin$ or pre?psychos$ or pre?psychotic$ or pre?schizo$ or (pre adj (delusion$ or hallucin$ or psychos$ or psychotic$ or schizo$)) or prodrom$ or sub?clinical$ or sub?threshold$ or at risk$ or ((high$ or incipient or increas$) adj3 risk$)).ti,ab,kw. (1088955)

10 or/8-9 (2925711)

11 (conversion$ or ((develop$ or progress$) adj2 (psychos$ or psychotic$ or schiz$)) or first episode$ or fullthreshold$ or full threshold$ or onset$ or progression or transition$ or transitory).ti,ab. (1559662)

12 10 and 11 (268386)

13 clinical high risk.ti,ab. (818)

14 ultra high risk.ti,ab. (1384)

15 basic symptoms.ti,ab. (461)

16 attenuated psychosis syndrome.ti,ab. (97)

17 ((at risk or ((high or increase$) adj2 risk) or blips or brief limited intermittent psychotic symptom$ or ((attenuat$ or early or premonitory) adj2 (sign$ or symptom$)) or prodrom$ or subclinical$ or sub$ clinical$ or subthreshold or sub$ threshold) and (psychos$ or psychotic$ or schiz$)).ti. or ((at risk or ((high or increase$) adj2 risk) or blips or brief limited intermittent psychotic symptom$ or ((attenuat$ or earlyor premonitory) adj2 (sign$ or symptom$)) or prodrom$ or subclinical$ or sub$ clinical$ or subthreshold or sub$ threshold) adj3 (psychos$ or psychotic$ or schiz$)).mp. [mp=title, abstract, heading word, drug trade name, original title, device manufacturer, drug manufacturer, device trade name, keyword, floating subheading] (7837)

18 or/13-17 (8641)

19 negative symptom$.ti,ab. (11896)

20 (expression adj2 emotion*).ti,ab. (3410)

21 ideational richness.ti,ab. (13)

22 (role functioning or occupational functioning or school functioning).ti,ab. (3678)

23 (experience adj2 (emotion or self)).ti,ab. (2043)

24 (social anhedonia or social withdrawal).ti,ab. (2220)

25 (avolition or motivation).ti,ab. (51729)

26 or/19-25 (73455)

27 6 and (or/7,12,18) and 26 (1997)

Database: Ovid MEDLINE(R)

1 exp psychotic disorders/ (50020)

2 deficit syndrome.ti,ab. (389)

3 exp schizophrenia/ (105295)

4 ((chronic$ or serious or persistent or severe$) adj (mental$ or psychological$) adj (disorder$ or ill$)).mp. (9904)

5 (delusion$ or hebephreni$ or psychosis or psychoses or psychotic$ or schizo$).mp. (224588)

6 or/1-5 (230778)

7 risk factors/ (726591)

8 symptom$.sh. or (prodrom$ or risk$).hw. (1051779)

9 (blips or brief limited intermittent psychotic symptom$ or ((attenuat$ or early or pre?monitory) adj2 (sign$ or symptom$)) or pre?delusion$ or pre?hallucin$ or pre?psychos$ or pre?psychotic$ or pre?schizo$ or (pre adj (delusion$ or hallucin$ or psychos$ or psychotic$ or schizo$)) or prodrom$ or sub?clinical$ or sub?threshold$ or at risk$ or ((high$ or incipient or increas$) adj3 risk$)).ti,ab,kw. (846231)

10 or/8-9 (1614662)

11 (conversion$ or ((develop$ or progress$) adj2 (psychos$ or psychotic$ or schiz$)) or first episode$ or fullthreshold$ or full threshold$ or onset$ or progression or transition$ or transitory).ti,ab. (1350820)

12 10 and 11 (134026)

13 clinical high risk.ti,ab. (599)

14 ultra high risk.ti,ab. (829)

15 basic symptoms.ti,ab. (266)

16 attenuated psychosis syndrome.ti,ab. (70)

17 ((at risk or ((high or increase$) adj2 risk) or blips or brief limited intermittent psychotic symptom$ or ((attenuat$ or early or premonitory) adj2 (sign$ or symptom$)) or prodrom$ or subclinical$ or sub$ clinical$ or subthreshold or sub$ threshold) and (psychos$ or psychotic$ or schiz$)).ti. or ((at risk or ((high or increase$) adj2 risk) or blips or brief limited intermittent psychotic symptom$ or ((attenuat$ or earlyor premonitory) adj2 (sign$ or symptom$)) or prodrom$ or subclinical$ or sub$ clinical$ or subthreshold or sub$ threshold) adj3 (psychos$ or psychotic$ or schiz$)).mp. [mp=title, abstract, original title, name of substance word, subject heading word, keyword heading word, protocol supplementary concept word, rare disease supplementary concept word, unique identifier] (5939)

18 or/13-17 (6450)

19 negative symptom$.ti,ab. (9177)

20 (expression adj2 emotion*).ti,ab. (2900)

21 ideational richness.ti,ab. (8)

22 (role functioning or occupational functioning or school functioning).ti,ab. (2754)

23 (experience adj2 (emotion or self)).ti,ab. (1753)

24 (social anhedonia or social withdrawal).ti,ab. (1723)

25 (avolition or motivation).ti,ab. (51025)

26 or/19-25 (68304)

27 6 and (or/7,12,18) and 26 (1078)

Database: EBM Reviews - Database of Abstracts of Reviews of Effects

1 psychotic disorders.mp. (114)

2 deficit syndrome.mp. (0)

3 schizophrenia.mp. (402)

4 ((chronic* or serious or persistent or severe*) adj (mental* or psychological*) adj (disorder* or ill*)).mp. (70)

5 (delusion* or hebephreni* or psychosis or psychoses or psychotic* or schizo*).mp. (554)

6 1 or 2 or 3 or 4 or 5 (598)

7 risk factors.mp. (2761)

8 (symptom* or (prodrom* or risk*)).mp. (12470)

9 (blips or brief limited intermittent psychotic symptom* or ((attenuat* or early or pre?monitory) adj2 (sign* or symptom*)) or pre?delusion* or pre?hallucin* or pre?psychos* or pre?psychotic* or pre?schizo* or (pre adj (delusion* or hallucin* or psychos* or psychotic* or schizo*)) or prodrom* or sub?clinical* or sub?threshold* or at risk* or ((high* or incipient or increas*) adj3 risk*)).mp. (10903)

10 or/8-9 (12479)

11 (conversion* or ((develop* or progress*) adj2 (psychos* or psychotic* or schiz*)) or first episode* or fullthreshold* or full threshold* or onset* or progression or transition* or transitory).mp. (1768)

12 10 and 11 (1167)

13 clinical high risk.mp. (0)

14 ultra high risk.mp. (3)

15 basic symptoms.mp. (1)

16 attenuated psychosis syndrome.mp. (0)

17 ((at risk or ((high or increase*) adj2 risk) or blips or brief limited intermittent psychotic symptom* or ((attenuat* or early or premonitory) adj2 (sign* or symptom*)) or prodrom* or subclinical* or sub* clinical* or subthreshold or sub* threshold) and (psychos* or psychotic* or schiz*)).ti. or ((at risk or ((high or increase*) adj2 risk) or blips or brief limited intermittent psychotic symptom* or ((attenuat* or earlyor premonitory) adj2 (sign* or symptom*)) or prodrom* or subclinical* or sub* clinical* or subthreshold or sub* threshold) adj3 (psychos* or psychotic* or schiz*)).mp. (33)

18 or/13-17 (33)

19 negative symptom$.mp. (49)

20 (expression adj2 emotion*).mp. (4)

21 ideational richness.mp. (0)

22 (role functioning or occupational functioning or school functioning).mp. (14)

23 (experience adj2 (emotion or self)).mp. (3)

24 (social anhedonia or social withdrawal).mp. (3)

25 (avolition or motivation).mp. (159)

26 19 or 20 or 21 or 22 or 23 or 24 or 25 (231)

27 6 and (7 or 12 or 18) and 26 (12)

Database: PsycINFO

1 psychotic disorders.mp. (5853)

2 deficit syndrome.mp. (355)

3 schizophrenia.mp. (111857)

4 ((chronic* or serious or persistent or severe*) adj (mental* or psychological*) adj (disorder* or ill*)).mp. (13090)

5 (delusion* or hebephreni* or psychosis or psychoses or psychotic* or schizo*).mp. (172838)

6 1 or 2 or 3 or 4 or 5 (182163)

7 risk factors.mp. (87803)

8 (symptom* or (prodrom* or risk*)).mp. (568277)

9 (blips or brief limited intermittent psychotic symptom* or ((attenuat* or early or pre?monitory) adj2 (sign* or symptom*)) or pre?delusion* or pre?hallucin* or pre?psychos* or pre?psychotic* or pre?schizo* or (pre adj (delusion* or hallucin* or psychos* or psychotic* or schizo*)) or prodrom* or sub?clinical* or sub?threshold* or at risk* or ((high* or incipient or increas*) adj3 risk*)).mp. (148104)

10 or/8-9 (576916)

11 (conversion* or ((develop* or progress*) adj2 (psychos* or psychotic* or schiz*)) or first episode* or fullthreshold* or full threshold* or onset* or progression or transition* or transitory).mp. (204266)

12 10 and 11 (56108)

13 clinical high risk.mp. (391)

14 ultra high risk.mp. (623)

15 basic symptoms.mp. (331)

16 attenuated psychosis syndrome.mp. (71)

17 ((at risk or ((high or increase*) adj2 risk) or blips or brief limited intermittent psychotic symptom* or ((attenuat* or early or premonitory) adj2 (sign* or symptom*)) or prodrom* or subclinical* or sub* clinical* or subthreshold or sub* threshold) and (psychos* or psychotic* or schiz*)).ti. or ((at risk or ((high or increase*) adj2 risk) or blips or brief limited intermittent psychotic symptom* or ((attenuat* or earlyor premonitory) adj2 (sign* or symptom*)) or prodrom* or subclinical* or sub* clinical* or subthreshold or sub* threshold) adj3 (psychos* or psychotic* or schiz*)).mp. (4779)

18 or/13-17 (5135)

19 negative symptom$.mp. (11272)

20 (expression adj2 emotion*).mp. (6253)

21 ideational richness.mp. (5)

22 (role functioning or occupational functioning or school functioning).mp. (2905)

23 (experience adj2 (emotion or self)).mp. (3915)

24 (social anhedonia or social withdrawal).mp. (2417)

25 (avolition or motivation).mp. (105269)

26 19 or 20 or 21 or 22 or 23 or 24 or 25 (130279)

27 6 and (7 or 12 or 18) and 26 (3112)

Database: CINHAL Plus

S1 MH "Psychotic Disorders+") OR "psychotic disorders" OR (MH "Schizophrenia+") OR "schizophrenia" (89,347)

S2 "ultra high risk" OR "clinical high risk" OR "basic symptoms" OR "attenuated psychosis syndrome" or "conversion" OR "transition" or (MH "Risk Factors") OR "risk factors" (305,483)

S3 "negative symptoms" OR "expression of emotion" OR "ideational richness" OR "role functioning" OR "school functioning" OR "occupational functioning" OR "experience of emotion" OR (MH "Anhedonia") OR "anhedonia" OR (MH "Motivation") OR "motivation" OR "avolition" (34,163)

S4 S1 AND S2 AND S3 (181)
