# Supplementary material for: Negative Symptom Interventions in Youth at Risk of Psychosis: A Systematic Review and Network Meta-analysis
Source: Oxford University Press journal article supplement (doi:10.1093/schbul/sbx139), 2017-09-06
Supplement: sbx139_suppl_supplementary_material_5.doc [file sbx139_suppl_supplementary_material_5.doc]

**Supplementary Material 5.** Network comparison-adjusted funnel plot

Comparison-adjusted funnel plot for the negative symptom network. Zero represents the null hypothesis that the study-specific effect sizes do not differ from the respective comparison-specific pooled effect estimates. Different colours correspond to different comparisons. Abbreviations: PLA = Placebo; RIS = Risperidone; OLA = Olanzapine; NMD = N-methyl-D-aspartate Receptor Modulators; OME = Omega-3; NBI = Needs Based Interventions; AMI = Amisulpride; CBT = Cognitive Behavioral Therapy; SUP= Supportive-Therapy; IPI = Integrated Psychological Interventions; FAM = Family-Therapy

**Supplementary Material 5.** Inconsistency Plot

**
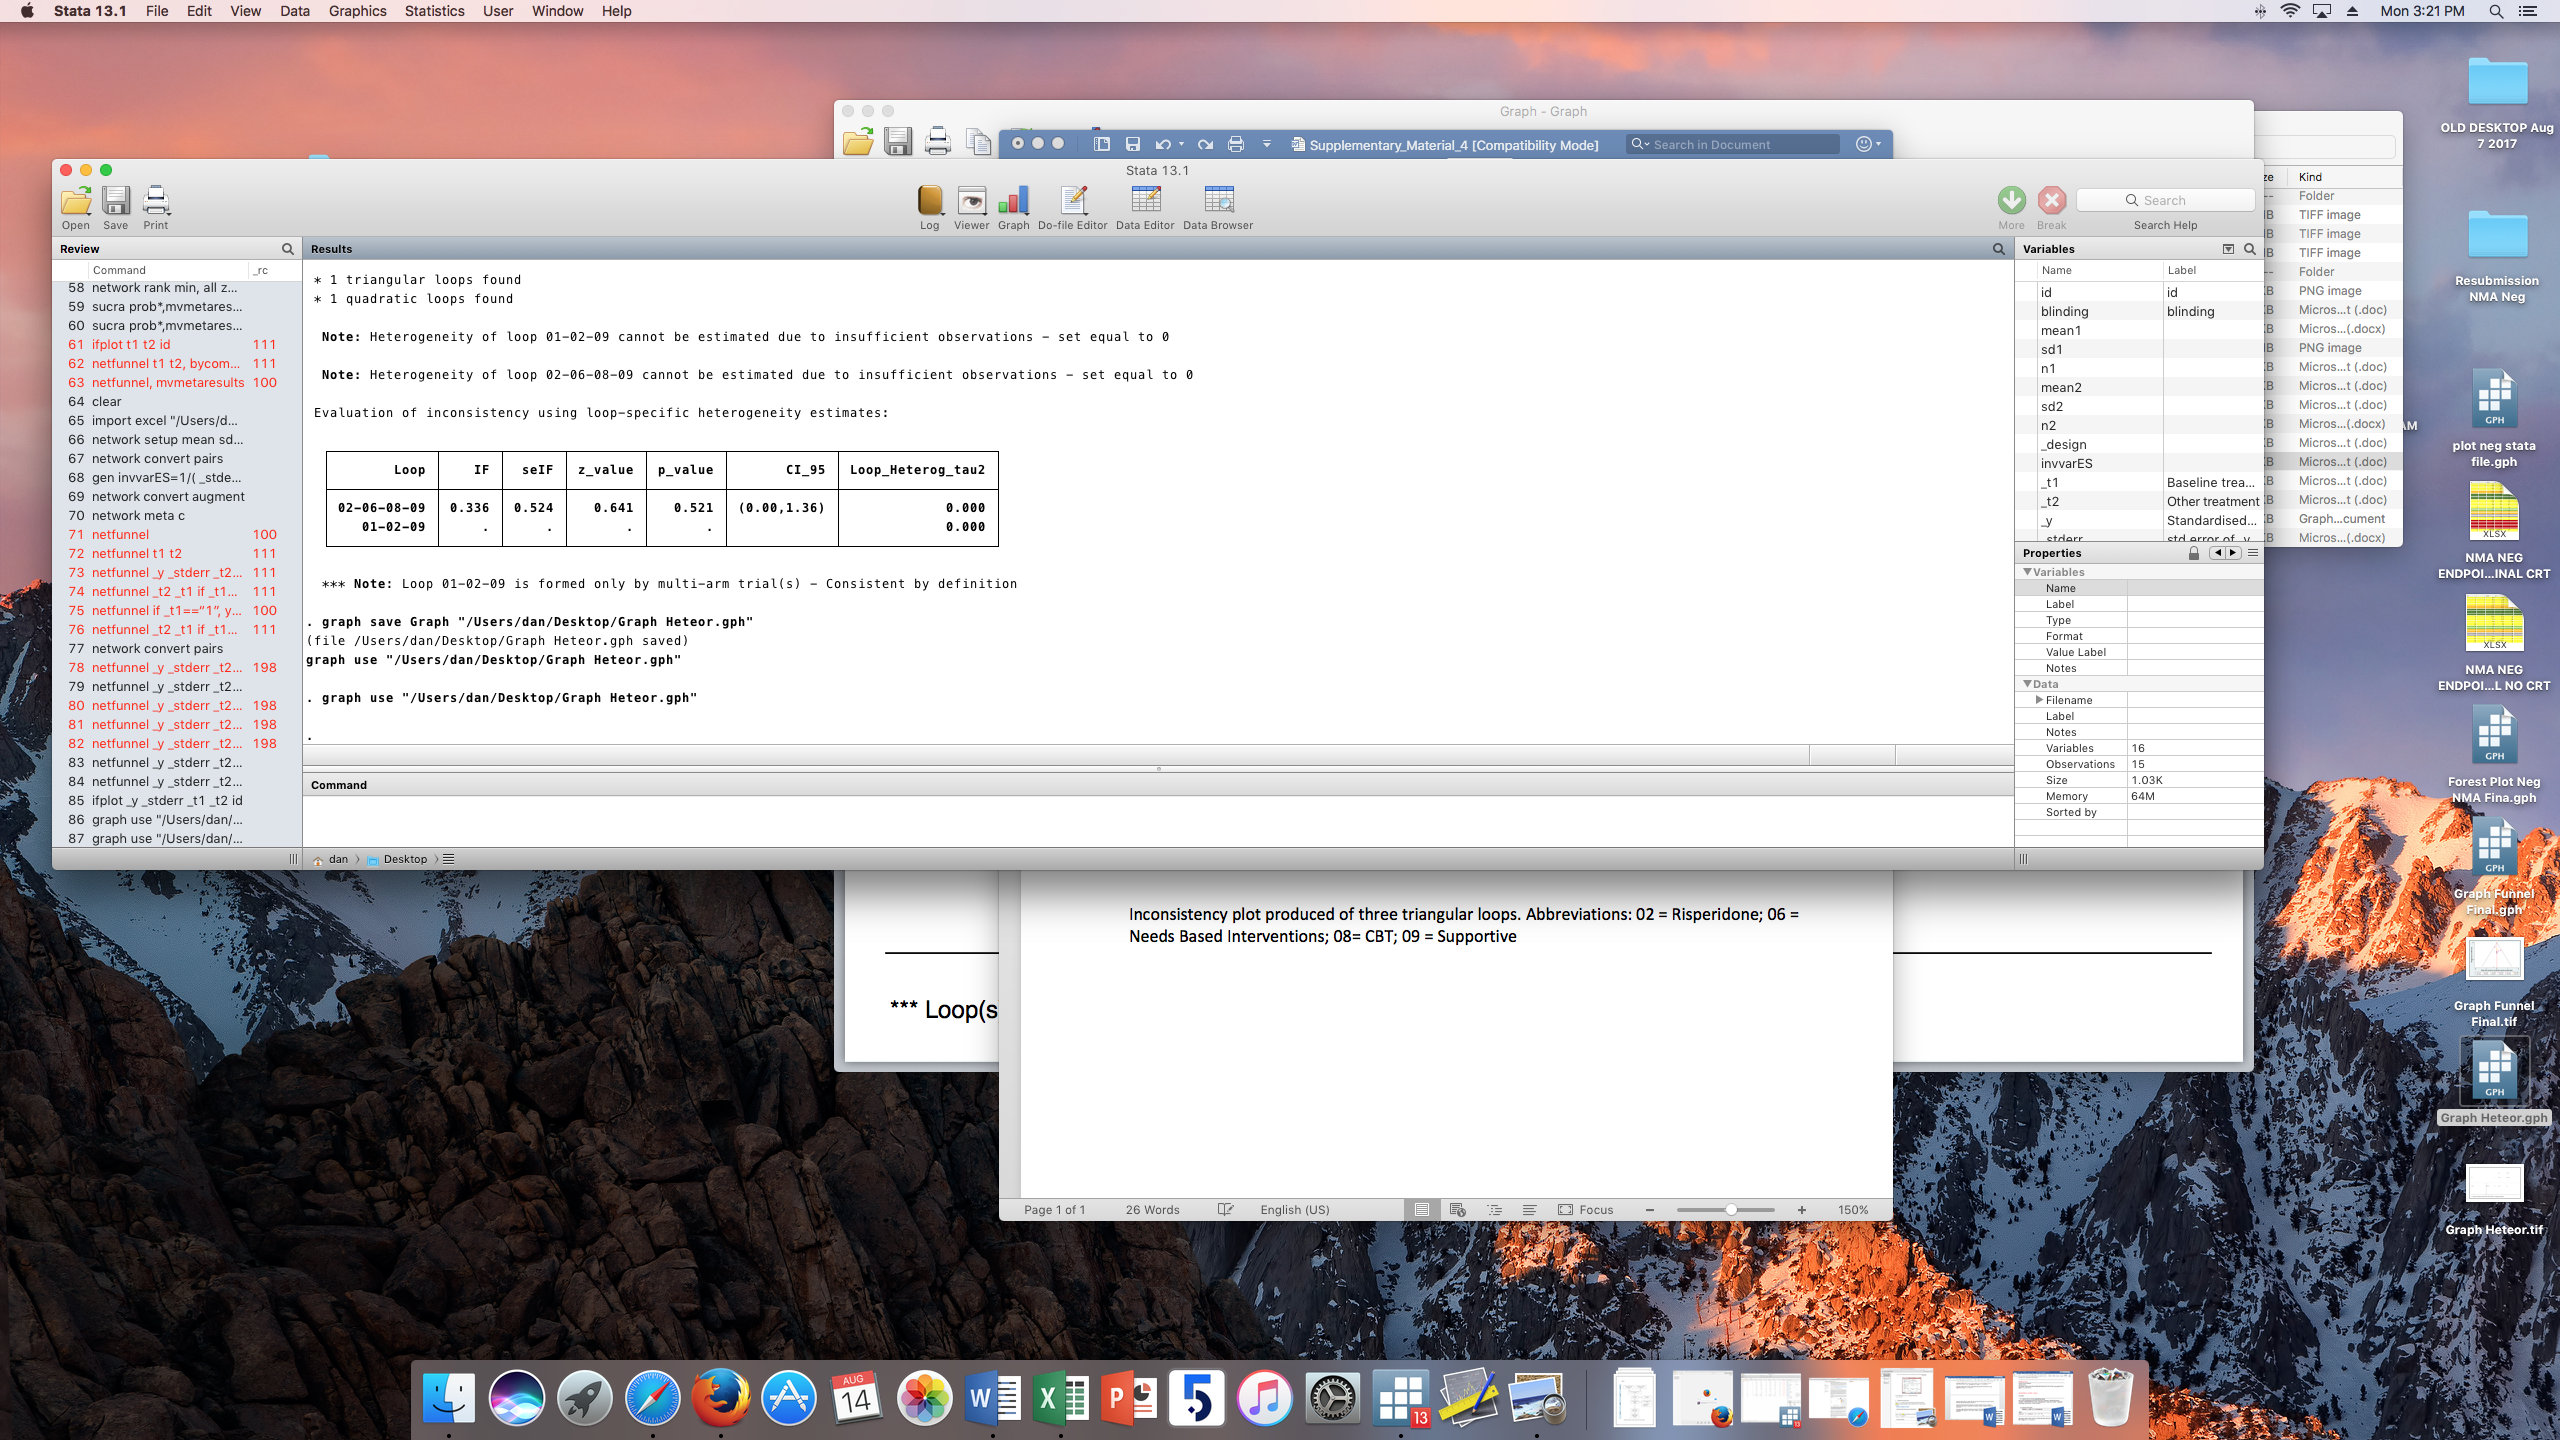
**

Inconsistency plot produced one quadratic loop. Abbreviations: 02 = Risperidone; 06 = Needs Based Interventions; 08=Cognitive Behavioral Therapy; 09 = Supportive

**Supplementary Material 5.** Surface under the cumulative ranking curve (SUCRA)

Plots of the surface under the cumulative ranking curves for all treatments in the negative symptom network. Black solid lines correspond to the unadjusted model. Abbreviations: NBI = Needs Based Interventions; CBT = Cognitive Behavioral Therapy; IPI = Integrated Psychological Interventions
