# Supplementary material for: Negative Symptom Interventions in Youth at Risk of Psychosis: A Systematic Review and Network Meta-analysis
Source: Oxford University Press journal article supplement (doi:10.1093/schbul/sbx139), 2017-09-06
Supplement: sbx139_suppl_supplementary_material_6.doc [file sbx139_suppl_supplementary_material_6.doc]

**Supplementary Material 6.** Pairwise Forest Plots

1. NMDAR


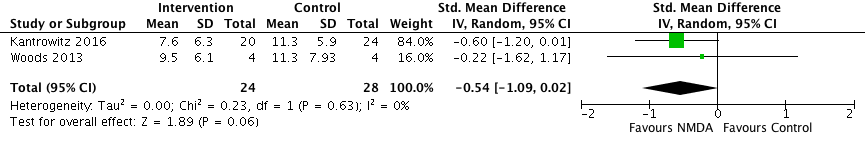


NMDAR impact on negative symptom scores in CHR.

1. Omega-3

A.


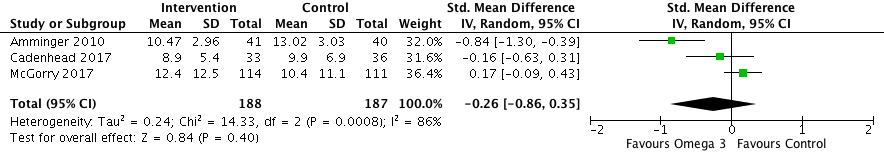


B.


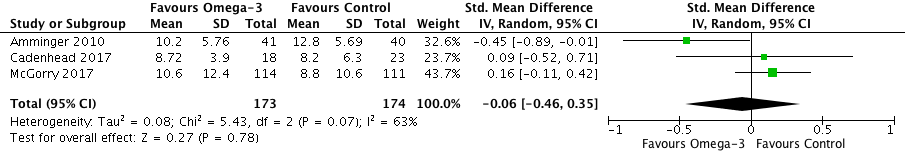


Omega 3 impact on negative symptom scores in CHR at (A) 6 months and (B) 12 months.

1. CBT


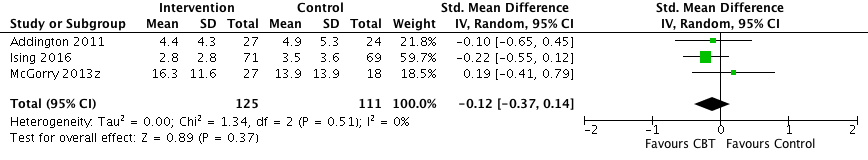


CBT impact on negative symptom scores in CHR. z = CBT + Placebo vs Supportive + Placebo

1. Family therapy

**Study name**

**Statistics for each study**

**Std diff in means**

**and 95% CI**

**Std diff**

**Standard**

**Lower**

**Upper**

**in means**

**error**

**limit**

**limit**

Landa 2015

-2.406

0.806

-3.985

-0.827

McFarlane 2015

-0.226

0.087

-0.397

-0.054

-1.169

1.080

-3.286

0.948

**-4.00**

**-2.00**

**0.00**

**2.00**

**4.00**

**Decrease in Negative Symptoms**

**Increase in Negative Symptoms**

Family therapy observational interventions examining pre/post negative symptom scores in CHR, using only studies that used no CHR control group. Random effects model (Z= -1.082, P=0.279).

1. Risperidone + CBT

A.


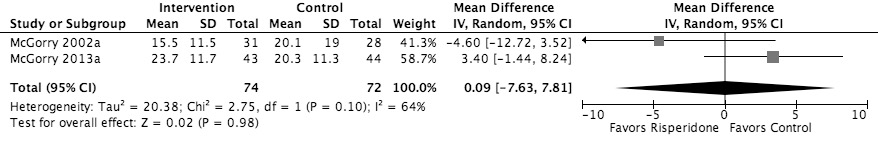


B.
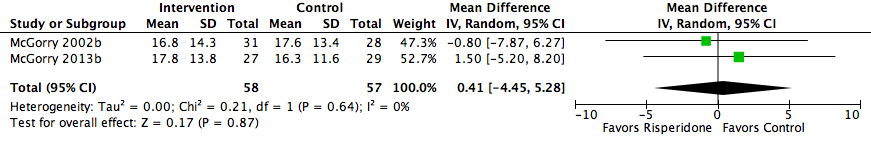


Risperidone + CBT vs Controls impact on negative symptom scores in CHR at (A) 6 months and (B) 12 months.

1. Aripiprazole

**Study name**

**Statistics for each study**

**Std diff in means**

**and 95% CI**

**Std diff**

**Standard**

**Lower**

**Upper**

**in means**

**error**

**limit**

**limit**

Kobayashi 2009

-0.454

0.175

-0.797

-0.111

Liu 2012

-0.715

0.354

-1.410

-0.021

Woods 2007

-1.069

0.324

-1.703

-0.435

-0.664

0.187

-1.030

-0.299

**-2.00**

**-1.00**

**0.00**

**1.00**

**2.00**

**Decrease in Negative Symptoms**

**Increase in Negative Symptoms**

Aripiprazole observational interventions examining pre/post negative symptom scores in CHR. Random effects model (Z= -3.561, P=0.00).

7) CRT


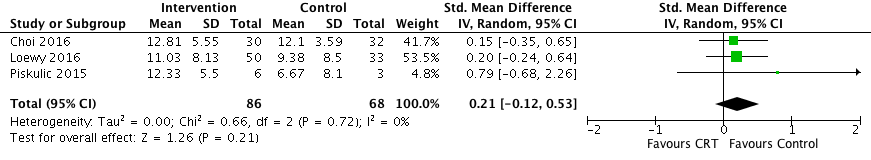


CRT impact on negative symptom scores
